# Supplementary material for: Long COVID Classification: Findings from a Clustering Analysis in the Predi-COVID Cohort Study
Source: Preprints.org preprint supplement (doi:10.20944/preprints202211.0033.v1), 2022-11-02
Supplement: Supplementary file 1 [file Supplementary Table A1. Full list of persisting symptoms considered in the 12-months questionnaire.xlsx]

## Sheet: Feuille 1
Supplementary Table A1. Full list of persisting symptoms considered in the 12-months questionnaire
Ear/Nose/Throat Symptoms	Neurological and ocular symptoms	General symptoms	Cardio-respiratory symptoms or diseases	Gastrointestinal symptoms	Vascular and ganglionic symptoms or diseases	Urinary symptoms	Skin symptoms
Loss of taste	Tremors	Fatigue	Shortness breath	Nausea	Hypertension	Urinary pain	Skin rashes
Loss of smell	Headaches	Irritability	Chest tightness	Vomiting	Hypotension	Urinary infections	Dry skin
Runny nose, cold or rhinitis	Migraines	Anxiety	Dry cough	Diarrhea	Adenopathies	Dialysis	Blue fingers
Sinus pain	Mental confusion	Depression	Fatty cough	Heartburn	Circulation disorders
Ear pain	Malaise	Sweating	Tachycardia	Abdominal pain	Hematoma
Sore throat	Convulsions	Fever	Arrhythmia
	Balance	Loss of appetite	Myocarditis
	Memory	Loss weight	Heart failure
	Fatigue in eyes	Thirst	Burning chest
	Hallucinations	Ants	Chest pain
	Sensitivity to light	Muscle pain (upper limbs)	Wheezing
	Conjunctivitis	Muscle pain (lower limbs)	Coughing blood
		Back pain
		Allergy
		Loss hair
		Difficulty walking
