# Supplementary material for: Long COVID Classification: Findings from a Clustering Analysis in the Predi-COVID Cohort Study
Source: Preprints.org preprint supplement (doi:10.20944/preprints202211.0033.v1), 2022-11-02
Supplement: Supplementary file 2 [file supplementary]

Archive with 5 entries (4 files):
- Supplementary figures-tables/
- Supplementary figures-tables/Supplementary Figure A1. Flowchart of participants included in the analyses (N = 288)..png
- Supplementary figures-tables/Supplementary Figure A2. Determination of cluster number.pdf
- Supplementary figures-tables/Supplementary Table A1. Full list of persisting symptoms considered in the 12-months questionnaire.xlsx
- Supplementary figures-tables/Supplementary Table A2. Full list of characteristics used for the clustering.xlsx
