# Supplementary material for: Long COVID Classification: Findings from a Clustering Analysis in the Predi-COVID Cohort Study
Source: Preprints.org preprint supplement (doi:10.20944/preprints202211.0033.v1), 2022-11-02
Supplement: Supplementary file 2 [file Supplementary Table A2. Full list of characteristics used for the clustering.xlsx]

## Sheet: output_simple
Supplementary table 2: Full list of characteristics used for the clustering
Sociodemographic Characteristics and Initial Severity Classification	Inclusion at home or at hospital
	Gender
	Age
	BMI
	Weight loss in last 6 months
	Smoking status
	Classification severity initial illness
	Blood type
Comorbidities	Hypertension
	Cardiac diseases
	Pulmonary diseases
	Asthma
	Renal diseases
	Hepatic diseases
	Neurological diseases
	Cancer
	Hematological diseases
	Obesity
	Diabetes
	Rheumatological diseases
	Malnutrition
	COPD
Symptoms at inclusion	Fever
	Cough
	Cough_sputum
	Cough hemoptysis
	Sore throat
	Rhinorrhea
	Earache
	Wheezing
	Chest_pain
	Myalgia
	Arthralgia
	Fatigue
	Dyspnea
	Chest tightness
	Cephalea
	Confusion
	Abdominal pain
	Nausea
	Diarrhea
	Conjunctivitis
	Skin rash
	Lymphadenopathy
	Fall
	Hemorrhage
Persisting symptoms at 12 months by categories	Ear Nose Throat (ENT) symptoms
	Neurological symptoms
	General symptoms
	Cardio-respiratory symptoms
	Gastrointestinal symptoms
	Vascular symptoms
	Urinary symptoms
	Skin symptoms
Quality of life	Could not envisage coping with symptoms long term N(%)
	PSQI score
	VQ11 global score
	VQ11 Functional component score
	VQ11 Psychological component score
	VQ11 Relational componnet score
