# Supplementary figures and images for: Long COVID Classification: Findings from a Clustering Analysis in the Predi-COVID Cohort Study
Source: Preprints.org preprint supplement (doi:10.20944/preprints202211.0033.v1), 2022-11-02

## Determination of cluster number

---

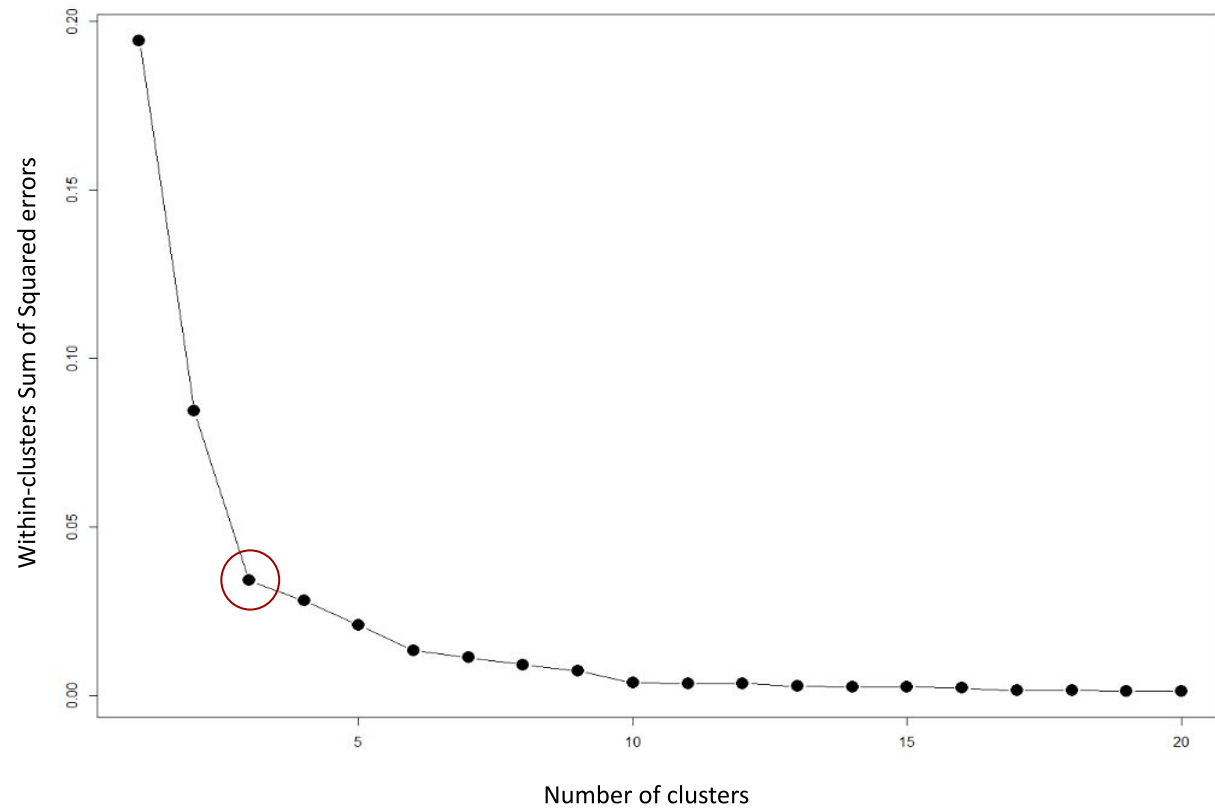

Supplement: Supplementary file 1 [file supplementary]

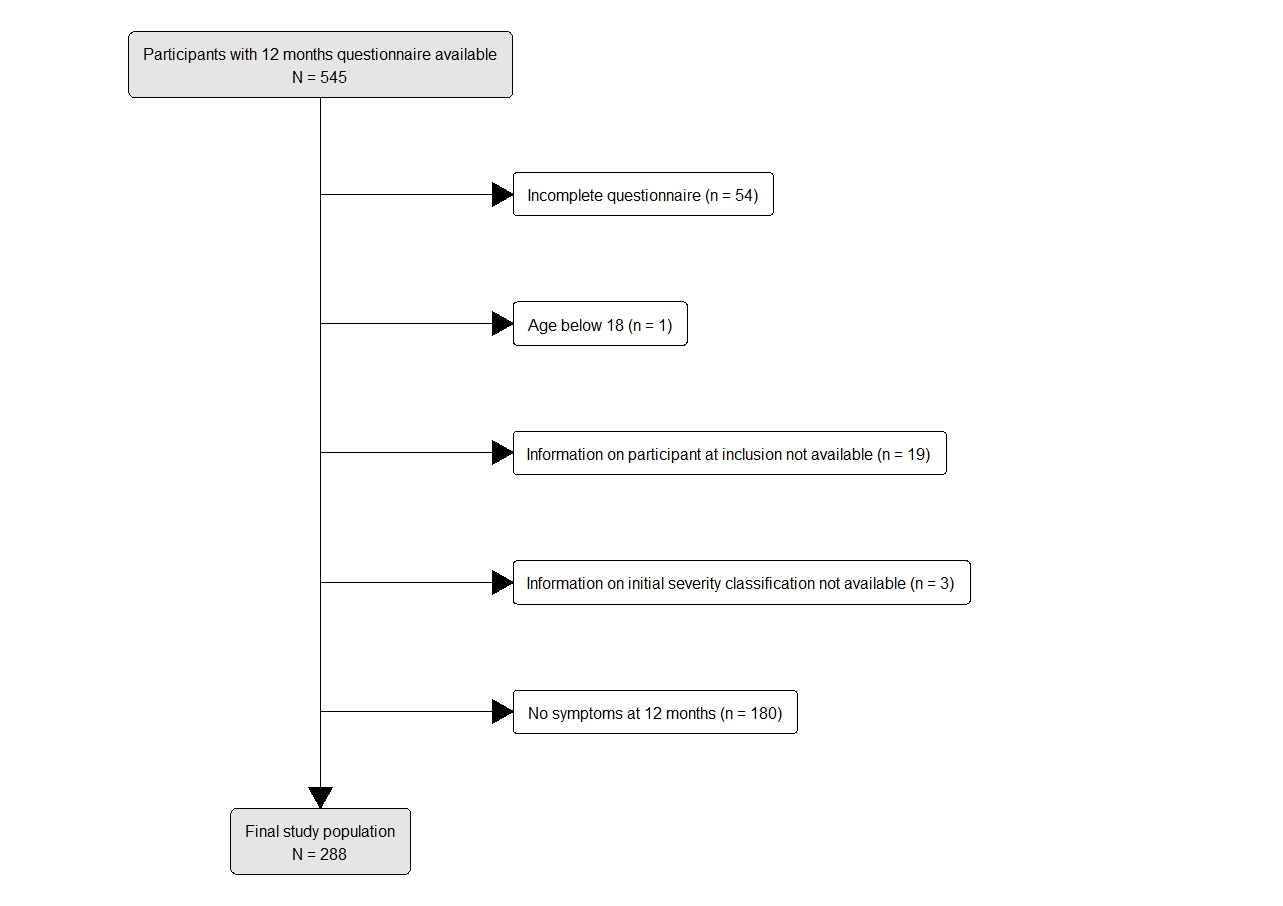

Supplement: Supplementary file 2 [file supplementary › Supplementary figures-tables/Supplementary Figure A1. Flowchart of participants included in the analyses (N = 288)..png]
